# Supplementary material
Source: MDPI journal article supplement (https://www.mdpi.com/2075-163X/11/8/818)
Supplement: s1 [file s1]

**Supplementary Table S1.** Backfill parameters of the open pit implemented previously.

| Materials   | Elastic Modulus (GPa) | Poisson's Ratio ( $\mu$ ) | Density (kg/m <sup>3</sup> ) | Compressive Strength (MPa) | Tensile Strength (MPa) | Cohesive Force (MPa) | Internal Friction Angle (°) |
|-------------|-----------------------|---------------------------|------------------------------|----------------------------|------------------------|----------------------|-----------------------------|
| Foundation1 | 0.62                  | 0.30                      | 1870                         | 2.0                        | 0.29                   | 0.31                 | 39.56                       |
| Foundation2 | 0.62                  | 0.30                      | 1890                         | 2.5                        | 0.35                   | 0.37                 | 39.92                       |
| Foundation3 | 0.65                  | 0.28                      | 1920                         | 3.0                        | 0.41                   | 0.44                 | 40.15                       |
| Foundation4 | 0.68                  | 0.27                      | 1950                         | 3.5                        | 0.44                   | 0.48                 | 40.93                       |
| Foundation5 | 0.70                  | 0.25                      | 2010                         | 4.0                        | 0.51                   | 0.56                 | 40.80                       |
| Backfill 1  | 0.50                  | 0.34                      | 1710                         | 0.5                        | 0.08                   | 0.08                 | 38.52                       |
| Backfill 2  | 0.55                  | 0.34                      | 1780                         | 1.0                        | 0.16                   | 0.17                 | 38.52                       |
| Backfill 3  | 0.60                  | 0.33                      | 1830                         | 1.5                        | 0.23                   | 0.24                 | 38.98                       |
| Backfill 4  | 0.62                  | 0.30                      | 1870                         | 2.0                        | 0.29                   | 0.31                 | 39.56                       |
| Backfill 5  | 0.62                  | 0.30                      | 1890                         | 2.5                        | 0.35                   | 0.37                 | 39.92                       |

**Supplementary Table S2.** Uniform design ratios.

| Number | Barite powder (g) | Sand (g) | Barite Powder/Sand | Gypsum (g) | Cement (g) | Gypsum/Cement | Sand to Binder Ratio |
|--------|-------------------|----------|--------------------|------------|------------|---------------|----------------------|
| 1      | 8495              | 5663     | 1.50               | 106        | 35         | 3.03          | 100                  |
| 2      | 9486              | 4672     | 2.03               | 106        | 35         | 3.03          | 100                  |
| 3      | 10052             | 4106     | 2.45               | 106        | 35         | 3.03          | 100                  |
| 4      | 8509              | 5673     | 1.50               | 89         | 30         | 2.97          | 120                  |
| 5      | 9502              | 4680     | 2.03               | 89         | 30         | 2.97          | 120                  |
| 6      | 10069             | 4113     | 2.45               | 89         | 30         | 2.97          | 120                  |
| 7      | 8519              | 5679     | 1.50               | 76         | 25         | 3.04          | 140                  |
| 8      | 9513              | 4686     | 2.03               | 76         | 25         | 3.04          | 140                  |
| 9      | 10081             | 4118     | 2.45               | 76         | 25         | 3.04          | 140                  |
| 10     | 8527              | 5684     | 1.50               | 67         | 22         | 3.05          | 160                  |
| 11     | 9521              | 4690     | 2.03               | 67         | 22         | 3.05          | 160                  |
| 12     | 10090             | 4121     | 2.45               | 67         | 22         | 3.05          | 160                  |

**Supplementary Table S3.** Results of uniform parameter tests.

| Number | Cohesive Force (MPa) | Internal Friction Angle (°) | Density (kg/m <sup>3</sup> ) | Compressive Strength (MPa) |
|--------|----------------------|-----------------------------|------------------------------|----------------------------|
| 1      | 0.06                 | 34.6                        | 2179                         | 0.35                       |
| 2      | 0.067                | 31.8                        | 2143                         | 0.34                       |
| 3      | 0.02                 | 49.7                        | 2103                         | 0.32                       |
| 4      | 0.043                | 38.0                        | 2161                         | 0.32                       |
| 5      | 0.07                 | 28.4                        | 2172                         | 0.23                       |
| 6      | 0.06                 | 33.4                        | 2139                         | 0.33                       |
| 7      | 0.033                | 44.3                        | 2125                         | 0.26                       |
| 8      | 0.033                | 37.7                        | 2180                         | 0.27                       |
| 9      | 0.031                | 45.8                        | 2194                         | 0.25                       |
| 10     | 0.021                | 41.2                        | 2219                         | 0.14                       |
| 11     | 0.02                 | 40.5                        | 2534                         | 0.13                       |
| 12     | 0.02                 | 37.6                        | 2740                         | 0.10                       |

**Supplementary Table S4.** Simulation results of safety factors of roofs and underground backfill pillars.

| Number | The First Principal Stress of the Roofs (MPa) | The Third Principal Stress of the Roofs (MPa) | The first Principal Stress of Underground Backfill Pillars (MPa) | The Third Principal Stress of Underground Backfill Pillars (MPa) | Safety Factors of Roofs | Safety Factors of Underground Backfill Pillars |
|--------|-----------------------------------------------|-----------------------------------------------|------------------------------------------------------------------|------------------------------------------------------------------|-------------------------|------------------------------------------------|
| 1      | 8.74                                          | 0.89                                          | 3.94                                                             | 0.12                                                             | 4.36                    | 2.91                                           |
| 2      | 8.93                                          | 1.09                                          | 3.90                                                             | 0.13                                                             | 3.52                    | 2.64                                           |
| 3      | 10.34                                         | 1.20                                          | 4.32                                                             | 0.17                                                             | 2.95                    | 2.45                                           |
| 4      | 11.25                                         | 0.84                                          | 4.96                                                             | 0.14                                                             | 3.99                    | 3.71                                           |
| 5      | 11.98                                         | 0.98                                          | 5.00                                                             | 0.14                                                             | 3.27                    | 3.62                                           |
| 6      | 9.74                                          | 1.34                                          | 4.27                                                             | 0.14                                                             | 2.74                    | 2.95                                           |
| 7      | 11.71                                         | 0.84                                          | 4.71                                                             | 0.12                                                             | 3.87                    | 4.04                                           |
| 8      | 10.78                                         | 1.59                                          | 5.22                                                             | 0.20                                                             | 2.17                    | 2.76                                           |
| 9      | 9.15                                          | 0.82                                          | 3.53                                                             | 0.08                                                             | 4.60                    | 3.64                                           |
| 10     | 8.12                                          | 1.64                                          | 4.18                                                             | 0.12                                                             | 2.44                    | 3.22                                           |
| 11     | 11.68                                         | 1.84                                          | 4.80                                                             | 0.18                                                             | 1.77                    | 2.70                                           |
| 12     | 7.50                                          | 0.59                                          | 4.33                                                             | 0.11                                                             | 6.98                    | 3.90                                           |
| 13     | 8.57                                          | 1.34                                          | 4.01                                                             | 0.13                                                             | 2.92                    | 2.76                                           |
| 14     | 9.95                                          | 1.09                                          | 4.42                                                             | 0.15                                                             | 3.32                    | 2.83                                           |
| 15     | 11.03                                         | 1.09                                          | 4.63                                                             | 0.20                                                             | 3.11                    | 2.28                                           |
| 16     | 10.84                                         | 1.34                                          | 4.08                                                             | 0.16                                                             | 2.56                    | 2.32                                           |
| 17     | 10.94                                         | 1.34                                          | 4.39                                                             | 0.17                                                             | 2.55                    | 2.46                                           |
| 18     | 10.17                                         | 1.09                                          | 4.72                                                             | 0.18                                                             | 3.28                    | 2.62                                           |
| 19     | 10.51                                         | 2.09                                          | 6.60                                                             | 0.43                                                             | 1.68                    | 1.82                                           |
| 20     | 7.83                                          | 0.59                                          | 4.93                                                             | 0.13                                                             | 6.90                    | 3.80                                           |
| 21     | 10.38                                         | 1.09                                          | 6.15                                                             | 0.19                                                             | 3.24                    | 3.60                                           |
| 22     | 10.09                                         | 1.59                                          | 6.52                                                             | 0.25                                                             | 2.26                    | 3.00                                           |
| 23     | 8.74                                          | 1.59                                          | 3.65                                                             | 0.10                                                             | 2.44                    | 3.02                                           |
| 24     | 9.73                                          | 1.34                                          | 4.24                                                             | 0.11                                                             | 2.74                    | 3.77                                           |
| 25     | 10.25                                         | 1.50                                          | 6.12                                                             | 0.20                                                             | 2.37                    | 3.56                                           |
